# Supplementary material for: Spatio-Temporal Changes and Habitats of Rare and Endangered Species in Yunnan Province Based on MaxEnt Model
Source: MDPI journal article supplement (doi:10.3390/land13020240), 2024-02-16
Supplement: s1 [file s1]

Table S1. The classification and classification criteria of rare and endangered species selected in this study

| <b>Endangered category</b> | <b>Basis of division</b>                                                                                                                                                                                                                                                                                                                                                                                                                                                                      |
|----------------------------|-----------------------------------------------------------------------------------------------------------------------------------------------------------------------------------------------------------------------------------------------------------------------------------------------------------------------------------------------------------------------------------------------------------------------------------------------------------------------------------------------|
| Vulnerable (VU)            | VU, taxon is Vulnerable when the best available evidence indicates that it meets any of the criteria A to E for vulnerable, and it is therefore considered to be facing a high risk of extinction in the wild.                                                                                                                                                                                                                                                                                |
| Near Threatened (NT)       | NT taxon is Near Threatened when it has been evaluated against the criteria but does not qualify for Critically Endangered, Endangered, or Vulnerable now, but is close to qualifying for or is likely to qualify for a threatened category in the near future.                                                                                                                                                                                                                               |
| Endangered (EN)            | EN, taxon is Endangered when the best available evidence indicates that it meets any of the criteria A to E for Endangered, and it is therefore considered to be facing a very high risk of extinction in the wild.                                                                                                                                                                                                                                                                           |
| Critically Endangered (CR) | CR, taxon is Critically Endangered when the best available evidence indicates that it meets any of the criteria A to E for Critically Endangered, and it is therefore considered to be facing an extremely high risk of extinction in the wild.                                                                                                                                                                                                                                               |
| Extinct (EX)               | EX, taxon is Extinct when there is no reasonable doubt that the last individual has died. A taxon is presumed extinct when exhaustive surveys in known and/or expected habitats, at appropriate times (diurnal, seasonal, annual), throughout its historic range have failed to record an individual. Surveys should be over a time frame appropriate to the taxon's life cycle and life form.                                                                                                |
| Extinct in the Wild (EW)   | EW, taxon is Extinct in the Wild when it is known only to survive in cultivation, in captivity, or as a naturalized population (or populations) well outside the past range. A taxon is presumed Extinct in the Wild when exhaustive surveys in known and/or expected habitats, at appropriate times (diurnal, seasonal, annual), throughout its historic range have failed to record an individual. Surveys should be over a time frame appropriate to the taxon's life cycle and life form. |

The A-E here are the five classification conditions: A. Population size reduction. Population reduction (measured over the longer of 10 years or 3 generations). B. Geographic range in the form of either B1 (extent of occurrence) AND/OR B2 (area of occupancy). C. Small population size and decline. D. Very small or restricted population. E. Quantitative Analysis[1].

Table S2. The list of species used in the article is classified by the family

| <b>Family</b> | <b>Records</b> | <b>Family</b>  | <b>Records</b> |
|---------------|----------------|----------------|----------------|
| Accipitridae  | 204            | Laridae        | 25             |
| Actinidiaceae | 33             | Lauraceae      | 83             |
| Alcedinidae   | 27             | Leiothrichidae | 7              |

|                           |     |                         |     |
|---------------------------|-----|-------------------------|-----|
| Anacardiaceae             | 6   | Magnoliaceae            | 95  |
| Anatidae                  | 209 | Malvaceae               | 23  |
| Animalia ( species group) | 68  | Megophryidae            | 23  |
| Annonaceae                | 18  | Melanthiaceae           | 117 |
| Apocynaceae               | 26  | Meliaceae               | 8   |
| Aquifoliaceae             | 47  | Moraceae                | 7   |
| Araliaceae                | 36  | Musaceae                | 7   |
| Arecaceae                 | 6   | Myristicaceae           | 10  |
| Aristolochiaceae          | 9   | Orchidaceae             | 265 |
| Asteraceae                | 27  | Phasianidae             | 319 |
| Atyidae                   | 6   | Picidae                 | 27  |
| Begoniaceae               | 13  | Pinaceae                | 168 |
| Berberidaceae             | 30  | Piperaceae              | 9   |
| Betulaceae                | 34  | Plantae (species group) | 77  |
| Bovidae                   | 11  | Podocarpaceae           | 6   |
| Bucerotidae               | 69  | Polypodiaceae           | 15  |
| Bufonidae                 | 12  | Pomatiopsidae           | 7   |
| Caprifoliaceae            | 21  | Proteaceae              | 14  |
| Celastraceae              | 7   | Psittacidae             | 107 |
| Cephalotaxaceae           | 23  | Pteridaceae             | 29  |
| Cercopithecidae           | 56  | Ranidae                 | 50  |
| Cervidae                  | 7   | Ranunculaceae           | 16  |
| Charadriidae              | 91  | Rhacophoridae           | 10  |
| Chloropseidae             | 98  | Rhizophoraceae          | 7   |
| Columbidae                | 7   | Rosaceae                | 18  |
| Corvidae                  | 10  | Rubiaceae               | 20  |
| Cupressaceae              | 126 | Salamandridae           | 56  |
| Cycadaceae                | 56  | Sapindaceae             | 129 |
| Dicroglossidae            | 58  | Sciuridae               | 14  |
| Dioscoreaceae             | 6   | Scolopacidae            | 18  |
| Dipterocarpaceae          | 17  | Sittidae                | 124 |
| Elephantidae              | 11  | Styracaceae             | 7   |
| Ericaceae                 | 41  | Taxaceae                | 61  |
| Fabaceae                  | 33  | Theaceae                | 54  |
| Fagaceae                  | 64  | Thymelaeaceae           | 14  |
| Felidae                   | 11  | Timaliidae              | 10  |
| Fungi (species group)     | 13  | Tricholomataceae        | 6   |
| Ginkgoaceae               | 12  | Trogonidae              | 7   |
| Gruidae                   | 51  | Ulmaceae                | 10  |

|               |    |               |    |
|---------------|----|---------------|----|
| Hylobatidae   | 15 | Ursidae       | 6  |
| Indicatoridae | 20 | Velloziaceae  | 10 |
| Juglandaceae  | 23 | Vitaceae      | 8  |
| Lamiaceae     | 11 | Zingiberaceae | 37 |

Table S3. Environmental variables used for modeling Yunnan province.

| Variables            | Indicators                                  | Data source                                                                                           |
|----------------------|---------------------------------------------|-------------------------------------------------------------------------------------------------------|
| Climatic factors     | bio1 Annual mean temperature                | WorldClim<br>( <a href="http://worldclim.org/version2">http://worldclim.org/version2</a> )            |
|                      | bio2 Mean diurnal range                     |                                                                                                       |
|                      | bio3 Isothermality                          |                                                                                                       |
|                      | bio4 Temperature seasonality                |                                                                                                       |
|                      | bio7 Temperature annual range               |                                                                                                       |
|                      | bio8 Mean temperature of wettest quarter    |                                                                                                       |
|                      | bio9 Mean temperature of driest quarter     |                                                                                                       |
|                      | bio10 Mean temperature of warmest quarter   |                                                                                                       |
|                      | bio11 Mean temperature of coldest quarter   |                                                                                                       |
|                      | bio12 Annual precipitation                  |                                                                                                       |
|                      | bio14 Precipitation of driest month         |                                                                                                       |
|                      | bio15 Precipitation seasonality             |                                                                                                       |
|                      | bio19 Precipitation of coldest quarter      |                                                                                                       |
| Topographical factor | DEM Digital elevation model                 | WorldClim<br>( <a href="http://worldclim.org/version2">http://worldclim.org/version2</a> )            |
|                      | Slope                                       |                                                                                                       |
|                      | Aspect                                      |                                                                                                       |
| Vegetation factors   | NDVI Normalized Difference Vegetation Index | United States Geological Survey (USGS)<br>( <a href="https://www.usgs.gov">https://www.usgs.gov</a> ) |

Table S4. Correlation analysis of 19 biological environmental variables

|       | bio1   | bio2   | bio3   | bio4   | bio5   | bio6   | bio7   | bio8   | bio9   | bio10  | bio11  | bio12  | bio13  | bio14  | bio15  | bio16  | bio17  | bio18  | bio19  |
|-------|--------|--------|--------|--------|--------|--------|--------|--------|--------|--------|--------|--------|--------|--------|--------|--------|--------|--------|--------|
| bio1  | 1      | 0.192  | 0.522  | -0.672 | 0.968  | 0.98   | -0.512 | 0.972  | 0.973  | 0.974  | 0.988  | 0.63   | 0.644  | 0.321  | 0.551  | 0.679  | 0.237  | 0.635  | 0.107  |
| bio2  | 0.192  | 1      | 0.771  | -0.53  | 0.174  | 0.053  | 0.231  | 0.069  | 0.305  | 0.071  | 0.274  | -0.105 | -0.097 | -0.172 | 0.027  | -0.093 | -0.222 | -0.135 | -0.158 |
| bio3  | 0.522  | 0.771  | 1      | -0.932 | 0.386  | 0.478  | -0.436 | 0.337  | 0.649  | 0.341  | 0.632  | 0.327  | 0.327  | 0.113  | 0.241  | 0.343  | 0.135  | 0.296  | 0.097  |
| bio4  | -0.672 | -0.53  | -0.932 | 1      | -0.515 | -0.672 | 0.67   | -0.49  | -0.787 | -0.495 | -0.771 | -0.573 | -0.567 | -0.263 | -0.35  | -0.583 | -0.294 | -0.531 | -0.227 |
| bio5  | 0.968  | 0.174  | 0.386  | -0.515 | 1      | 0.932  | -0.321 | 0.984  | 0.921  | 0.985  | 0.933  | 0.539  | 0.556  | 0.255  | 0.525  | 0.588  | 0.131  | 0.536  | 0.03   |
| bio6  | 0.98   | 0.053  | 0.478  | -0.672 | 0.932  | 1      | -0.639 | 0.952  | 0.955  | 0.954  | 0.973  | 0.675  | 0.687  | 0.355  | 0.55   | 0.719  | 0.298  | 0.675  | 0.16   |
| bio7  | -0.512 | 0.231  | -0.436 | 0.67   | -0.321 | -0.639 | 1      | -0.402 | -0.545 | -0.404 | -0.565 | -0.626 | -0.621 | -0.388 | -0.326 | -0.638 | -0.505 | -0.633 | -0.361 |
| bio8  | 0.972  | 0.069  | 0.337  | -0.49  | 0.984  | 0.952  | -0.402 | 1      | 0.91   | 1      | 0.932  | 0.564  | 0.582  | 0.3    | 0.534  | 0.617  | 0.194  | 0.583  | 0.064  |
| bio9  | 0.973  | 0.305  | 0.649  | -0.787 | 0.921  | 0.955  | -0.545 | 0.91   | 1      | 0.913  | 0.991  | 0.667  | 0.672  | 0.335  | 0.503  | 0.699  | 0.271  | 0.643  | 0.183  |
| bio10 | 0.974  | 0.071  | 0.341  | -0.495 | 0.985  | 0.954  | -0.404 | 1      | 0.913  | 1      | 0.935  | 0.568  | 0.585  | 0.301  | 0.531  | 0.62   | 0.198  | 0.582  | 0.07   |
| bio11 | 0.988  | 0.274  | 0.632  | -0.771 | 0.933  | 0.973  | -0.565 | 0.932  | 0.991  | 0.935  | 1      | 0.648  | 0.658  | 0.323  | 0.533  | 0.69   | 0.26   | 0.641  | 0.142  |
| bio12 | 0.63   | -0.105 | 0.327  | -0.573 | 0.539  | 0.675  | -0.626 | 0.564  | 0.667  | 0.568  | 0.648  | 1      | 0.972  | 0.454  | 0.426  | 0.977  | 0.526  | 0.947  | 0.458  |
| bio13 | 0.644  | -0.097 | 0.327  | -0.567 | 0.556  | 0.687  | -0.621 | 0.582  | 0.672  | 0.585  | 0.658  | 0.972  | 1      | 0.319  | 0.58   | 0.992  | 0.378  | 0.974  | 0.293  |
| bio14 | 0.321  | -0.172 | 0.113  | -0.263 | 0.255  | 0.355  | -0.388 | 0.3    | 0.335  | 0.301  | 0.323  | 0.454  | 0.319  | 1      | -0.211 | 0.351  | 0.815  | 0.361  | 0.724  |
| bio15 | 0.551  | 0.027  | 0.241  | -0.35  | 0.525  | 0.55   | -0.326 | 0.534  | 0.503  | 0.531  | 0.533  | 0.426  | 0.58   | -0.211 | 1      | 0.598  | -0.383 | 0.601  | -0.534 |
| bio16 | 0.679  | -0.093 | 0.343  | -0.583 | 0.588  | 0.719  | -0.638 | 0.617  | 0.699  | 0.62   | 0.69   | 0.977  | 0.992  | 0.351  | 0.598  | 1      | 0.389  | 0.981  | 0.289  |
| bio17 | 0.237  | -0.222 | 0.135  | -0.294 | 0.131  | 0.298  | -0.505 | 0.194  | 0.271  | 0.198  | 0.26   | 0.526  | 0.378  | 0.815  | -0.383 | 0.389  | 1      | 0.375  | 0.915  |
| bio18 | 0.635  | -0.135 | 0.296  | -0.531 | 0.536  | 0.675  | -0.633 | 0.583  | 0.643  | 0.582  | 0.641  | 0.947  | 0.974  | 0.361  | 0.601  | 0.981  | 0.375  | 1      | 0.265  |
| bio19 | 0.107  | -0.158 | 0.097  | -0.227 | 0.03   | 0.16   | -0.361 | 0.064  | 0.183  | 0.07   | 0.142  | 0.458  | 0.293  | 0.724  | -0.534 | 0.289  | 0.915  | 0.265  | 1      |

Table S5.AUC value in the current and various situational model running processes

| Scenario    | AUC(average) |
|-------------|--------------|
| Current     | 0.8627       |
| RCP2.6,2050 | 0.8616       |
| RCP2.6,2070 | 0.8616       |
| RCP4.5,2050 | 0.8573       |
| RCP4.5,2070 | 0.8616       |
| RCP6.0,2050 | 0.8547       |
| RCP6.0,2070 | 0.8596       |
| RCP8.5,2050 | 0.8577       |
| RCP8.5,2070 | 0.8592       |

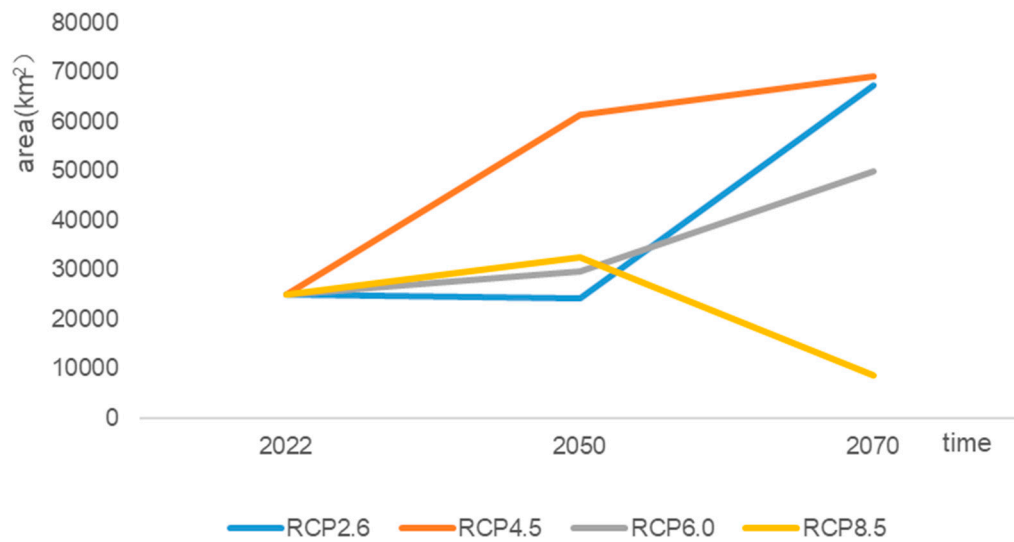

Figure S1. Changes in high-richness areas over time under different emission modes

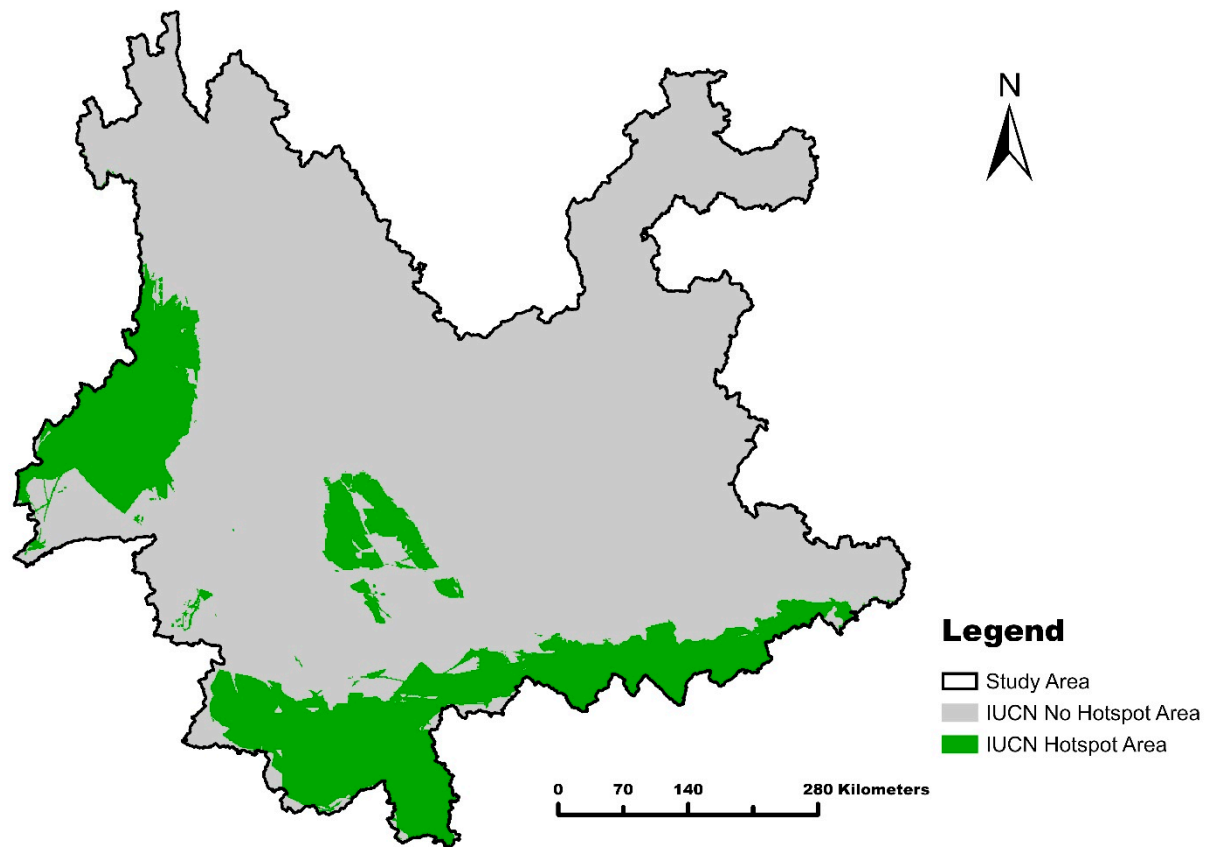

Figure S2. Hotspot distribution predicted by IUCN data

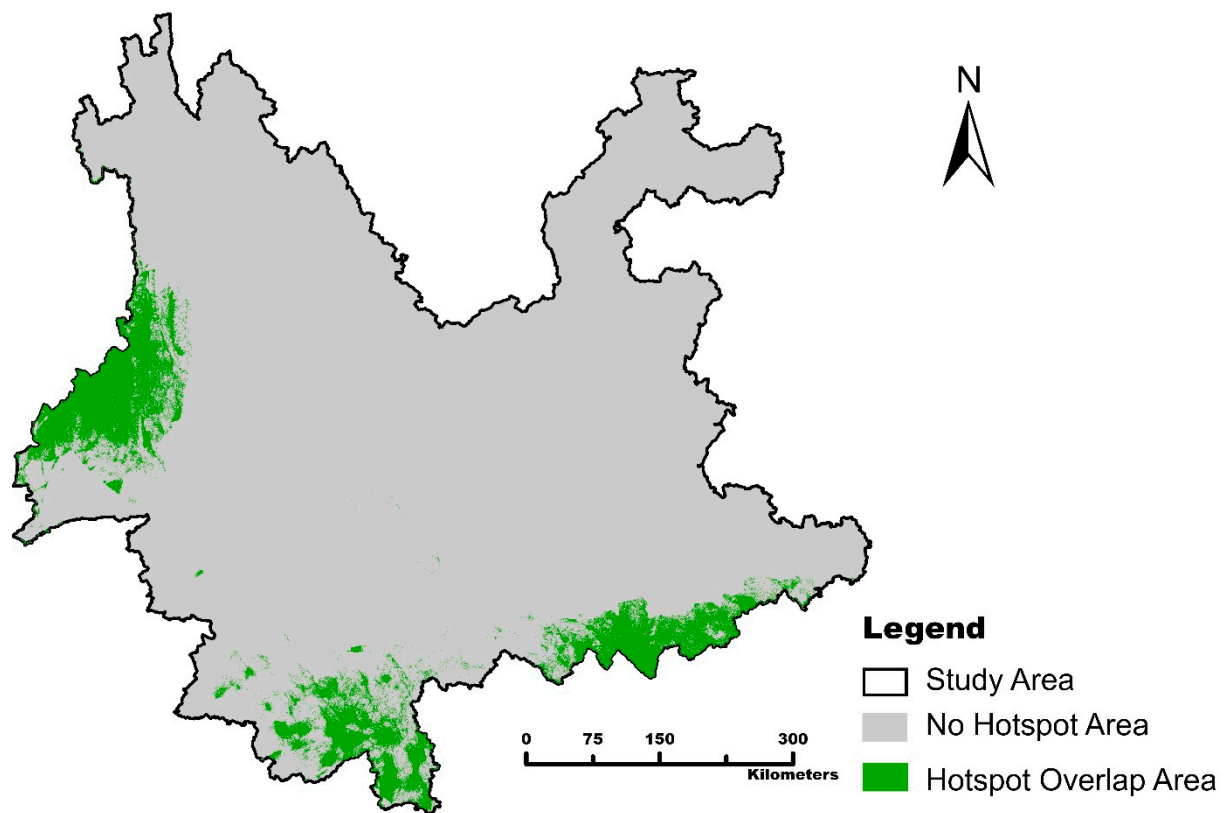

Figure S3. Overlap hotspot distribution predicted by MaxEnt model and IUCN data



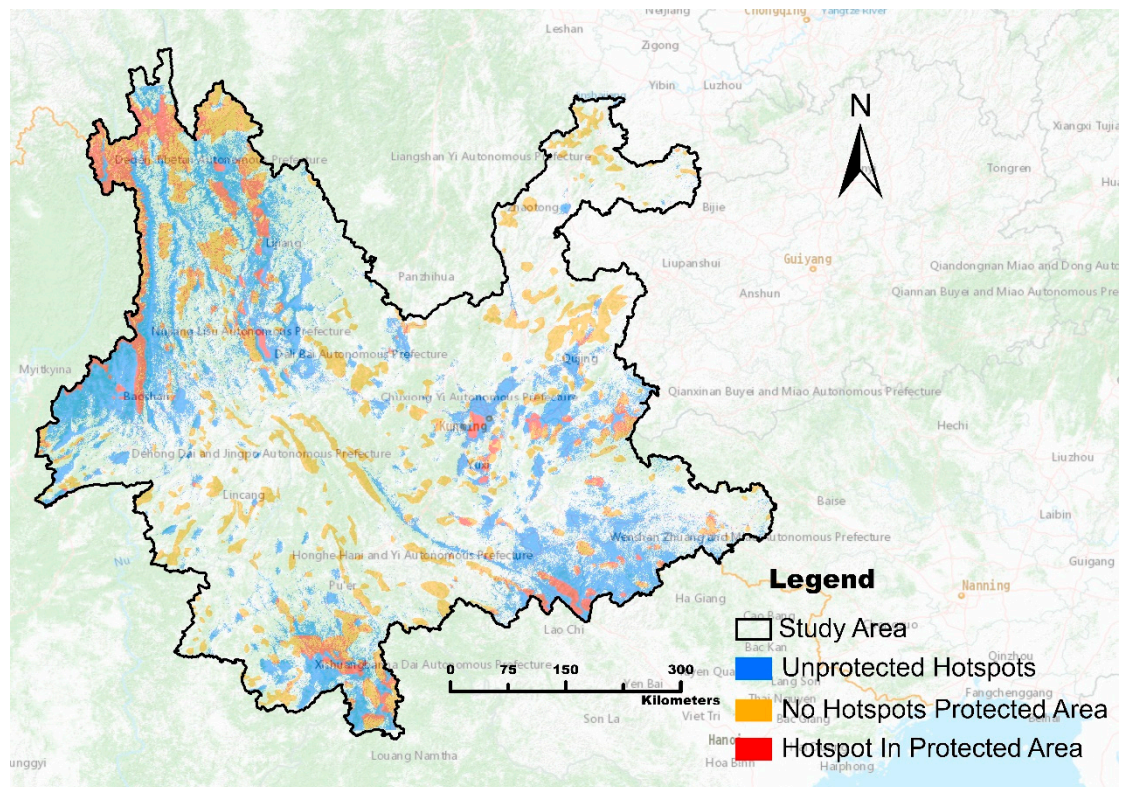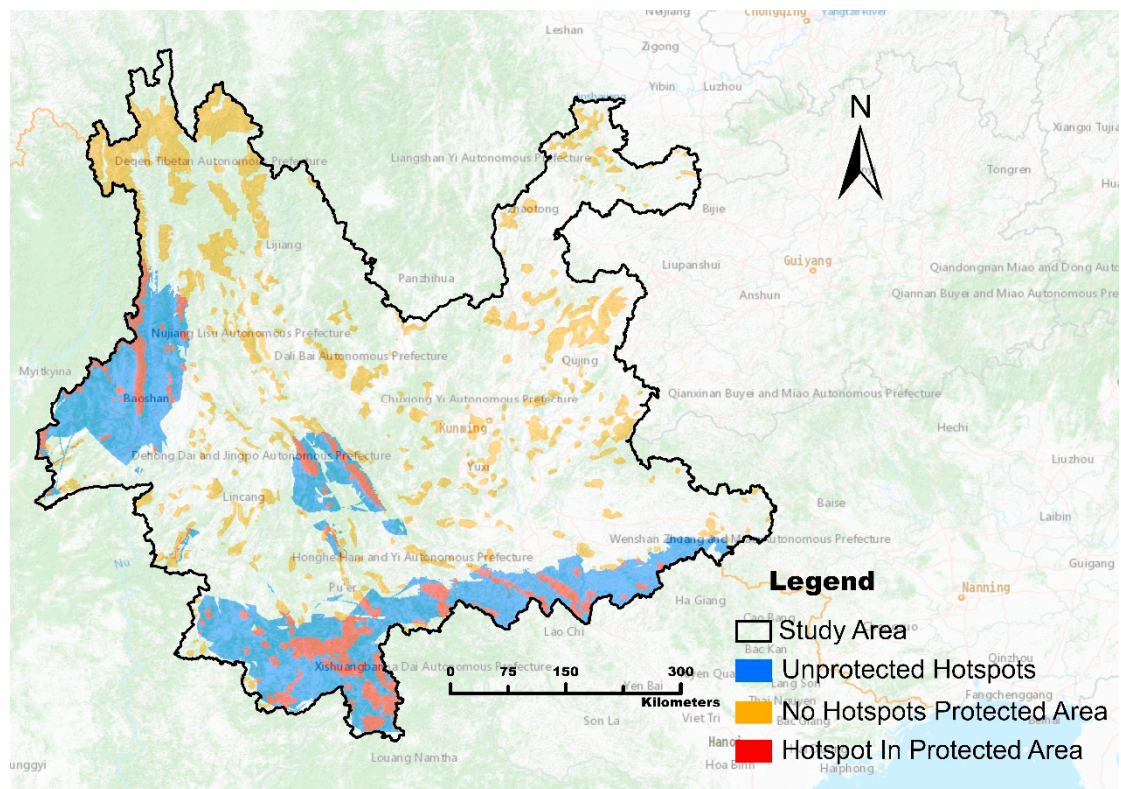

Figure S4. Distribution of protected hotspots in MaxEnt forecast and IUCN data forecast results





|                |                          | Unsuitable area | Low richness area | Med richness area | High richness area | Total (km <sup>2</sup> ) |
|----------------|--------------------------|-----------------|-------------------|-------------------|--------------------|--------------------------|
| RCP4.5<br>2050 | Unsuitable area          | 51707.08        | 25936.51          | 83.23             | 77726.82           | 155453.63                |
|                | Low richness area        | 9143.31         | 87334.42          | 29588.08          | 2067.36            | 128133.16                |
|                | Medium richness area     | 1131.37         | 22302.56          | 75405.08          | 18249.37           | 117088.38                |
|                | High richness area       | 61505.38        | 4.66              | 12680.69          | 48795.85           | 122986.58                |
|                | Total (km <sup>2</sup> ) | 123487.14       | 135578.14         | 117757.07         | 146839.40          | 523661.75                |
| RCP6.0 2050    |                          |                 |                   |                   |                    |                          |
|                |                          | Unsuitable area | Low richness area | Med richness area | High richness area | Total (km <sup>2</sup> ) |
| 2022           | Unsuitable area          | 82457.38        | 74090.63          | 14129.13          | 854.01             | 171531.15                |
|                | Low richness area        | 32472.97        | 52345.81          | 32046.52          | 4709.87            | 121575.17                |
|                | Medium richness area     | 9439.05         | 20305.33          | 26438.70          | 10083.53           | 66266.61                 |
|                | High richness area       | 678.43          | 3228.22           | 7047.42           | 14126.73           | 25080.80                 |
|                | Total (km <sup>2</sup> ) | 125047.83       | 149969.99         | 79661.78          | 29774.14           | 384453.74                |
| RCP6.0 2070    |                          |                 |                   |                   |                    |                          |
|                |                          | Unsuitable area | Low richness area | Med richness area | High richness area | Total (km <sup>2</sup> ) |
| RCP6.0<br>2050 | Unsuitable area          | 43379.62        | 79676.18          | 1992.03           | 0.0018             | 125047.83                |
|                | Low richness area        | 1381.81         | 89271.52          | 57935.78          | 1380.88            | 149969.99                |

|                          |          |           |           |          |           |
|--------------------------|----------|-----------|-----------|----------|-----------|
| Medium richness area     | 30.32    | 14285.24  | 41444.35  | 23901.87 | 79661.78  |
| High richness area       | 29774.14 | 435.82    | 4675.80   | 24658.01 | 59543.77  |
| Total (km <sup>2</sup> ) | 74565.89 | 183668.77 | 106047.96 | 49940.75 | 414223.37 |

| RCP8.5 2050 |                          |                   |                   |                    |                          |           |
|-------------|--------------------------|-------------------|-------------------|--------------------|--------------------------|-----------|
|             | Unsuitable area          | Low richness area | Med richness area | High richness area | Total (km <sup>2</sup> ) |           |
| 2022        | Unsuitable area          | 87768.15          | 70759.51          | 12438.84           | 564.65                   | 171531.15 |
|             | Low richness area        | 31565.05          | 54183.31          | 30678.06           | 5148.75                  | 121575.17 |
|             | Medium richness area     | 8546.46           | 21213.17          | 24062.87           | 12444.12                 | 66266.61  |
|             | High richness area       | 714.74            | 3024.83           | 6907.35            | 14433.88                 | 25080.80  |
|             | Total (km <sup>2</sup> ) | 128594.41         | 149180.81         | 74087.12           | 32591.40                 | 384453.74 |

| RCP8.5 2070 |                      |                   |                   |                    |                          |           |
|-------------|----------------------|-------------------|-------------------|--------------------|--------------------------|-----------|
|             | Unsuitable area      | Low richness area | Med richness area | High richness area | Total (km <sup>2</sup> ) |           |
| RCP8.5 2050 | Unsuitable area      | 100434.19         | 28115.92          | 44.29              | 128594.41                | 257188.82 |
|             | Low richness area    | 28158.13          | 101035.29         | 19987.40           | 149180.81                | 298361.62 |
|             | Medium richness area | 1423.37           | 34110.19          | 38340.14           | 213.41                   | 74087.12  |
|             | High richness area   | 0.17              | 2959.80           | 21147.85           | 8483.59                  | 32591.40  |

|                             |           |           |          |           |           |
|-----------------------------|-----------|-----------|----------|-----------|-----------|
| Total<br>(km <sup>2</sup> ) | 130015.87 | 166221.19 | 79519.68 | 286472.22 | 662228.96 |
|-----------------------------|-----------|-----------|----------|-----------|-----------|

The steps for making the richness transfer matrix are as follows:

1. Extract the layers of each richness area and assign them a value of 1.
2. Add each of the two richness layers at different times with the raster calculator tool.  
The value of 2 is the part that has shifted between the two richness layers over time.
3. Calculate the area of the calculated area with the value of 2 and fill it into the prepared richness transfer matrix.

We have included this part of the article and supplementary material.

Table S7. Data comparison of two prediction models

|                                                       | Maximum entropy model<br>predictions | IUCN data predictions   |
|-------------------------------------------------------|--------------------------------------|-------------------------|
| Overlap area with hot spot<br>area                    | 42118.31km <sup>2</sup>              | 40377.51km <sup>2</sup> |
| Proportion of overlapping<br>areas in Yunnan Province | 0.0122%                              | 0.0117%                 |
| Proportion of overlapping area<br>in protected area   | 64.2457%                             | 61.5903%                |
| Proportion of hot spots in<br>overlapping areas       | 19.7810%                             | 18.2746%                |

Table S8. The current proportion of land use types in hotspots

| Type of land use | Area(km <sup>2</sup> ) | Proportion |
|------------------|------------------------|------------|
|------------------|------------------------|------------|

|                                                          |          |        |
|----------------------------------------------------------|----------|--------|
| Arable Land                                              | 23665.39 | 25.32% |
| Woodland                                                 | 41262.03 | 44.14% |
| Grassland                                                | 22954.51 | 24.56% |
| Waters                                                   | 2134.76  | 2.28%  |
| Urban and rural, Industrial and Mining, Residential Land | 2313.97  | 2.48%  |
| Unused land                                              | 1140.47  | 1.22%  |

Table S9. Ranking of hot spot areas in prefecture-level cities

| Emission scenarios | Ranking of areas of high richness |         |               |
|--------------------|-----------------------------------|---------|---------------|
|                    | 1                                 | 2       | 3             |
| Current            | Baoshan                           | Honghe  | Dali          |
| RCP2.6,2050        | Honghe                            | Kunming | Baoshan       |
| RCP2.6,2070        | Baoshan                           | Dehong  | Xishuangbanna |
| RCP4.5,2050        | Honghe                            | Baoshan | Xishuangbanna |
| RCP4.5,2070        | Baoshan                           | Dehong  | Honghe        |
| RCP6.0,2050        | Baoshan                           | Dehong  | Kunming       |
| RCP6.0,2070        | Baoshan                           | Kunming | Dali          |

|             |         |        |         |
|-------------|---------|--------|---------|
| RCP8.5,2050 | Baoshan | Dehong | Nujiang |
|-------------|---------|--------|---------|

|             |         |        |        |
|-------------|---------|--------|--------|
| RCP8.5,2070 | Baoshan | Dehong | Qvjing |
|-------------|---------|--------|--------|

---

## Reference

[106] IUCN. IUCN Red List Categories and Criteria: Version 3.1. Second edition. Gland, Switzerland and Cambridge, UK: IUCN, 2012; pp.14-29.
